# Supplementary material for: Biomimetic folding of small organic molecules driven by multiple non-covalent interactions
Source: Royal Society of Chemistry journal article supplement (doi:10.1039/c9qo00089e), 2019-01-01
Supplement: c9qo00089e1.pdf [file c9qo00089e1.pdf]

## Electronic Supplementary Information

### Biomimetic folding of small organic molecules driven by multiple non-covalent interactions†

Tangxin Xiao,<sup>‡\*a</sup> Lixiang Xu,<sup>‡a</sup> Jie Wang,<sup>a</sup> Zheng-Yi Li,<sup>a</sup> Xiao-Qiang Sun,<sup>\*a</sup> Leyong Wang,<sup>\*a,b</sup>

<sup>a</sup>*Jiangsu Key Laboratory of Advanced Catalytic Materials and Technology, School of Petrochemical Engineering, Changzhou University, Changzhou, 213164, China. E-mail: xiaotangxin@cczu.edu.cn, xqsun@cczu.edu.cn*

<sup>b</sup>*School of Chemistry and Chemical Engineering, Nanjing University, Nanjing, 210023, China. E-mail: lywang@nju.edu.cn*

†These authors contributed equally to this work.

#### Table of contents

|                                                                               |     |
|-------------------------------------------------------------------------------|-----|
| 1. Materials and methods.....                                                 | S1  |
| 2. COSY of <b>M1</b> .....                                                    | S2  |
| 3. NOESY of <b>M1</b> .....                                                   | S3  |
| 4. DOSY of <b>M1</b> .....                                                    | S4  |
| 5. Concentration-dependent <sup>1</sup> H NMR spectra of <b>M1</b> .....      | S5  |
| 6. Crystallographic Data for <b>M2</b> .....                                  | S5  |
| 7. Synthetic procedures and characterization of <b>M1</b> and <b>M2</b> ..... | S7  |
| 8. References.....                                                            | S20 |

## 1. Materials and methods

All reactions were carried out under normal pressure unless noted. The commercially available reagents and solvents were either employed as purchased or dried according to procedures described in the literature. All yields were given as isolated yields. **N1**<sup>S1</sup>, **L1**<sup>S2</sup> and **L2**<sup>S3</sup> were prepared according to literature procedure. NMR spectra were recorded on a Bruker AVANCE III 300 MHz or a Bruker AVANCE III 400 MHz spectrometer with internal standard tetramethylsilane (TMS) and solvent signals as internal references, where CDCl<sub>3</sub> was dried using neutral aluminum oxide. COSY experiments were performed on a Bruker AVANCE III 300 MHz spectrometer. NOESY experiments were performed on a Bruker AVANCE III 400 MHz spectrometer. DOSY experiments were performed on a Bruker AVANCE III 600 MHz spectrometer. Low-resolution electrospray ionization mass spectra (LR-ESI-MS) were obtained on LCMS2020. High-resolution electrospray ionization mass spectra (HR-ESI-MS) were recorded on an Agilent Technologies 6540 UHD Accurate-Mass. Scanning electron microscopy (SEM) images were recorded on a JSM-6360LA. Single crystal X-ray data was measured on a Bruker SMART APEX II CCD diffractometer (Mo K $\alpha$  radiation,  $\lambda$  = 0.71073 Å). Structure solutions and refinements were carried out using the SHELXTL-PC software package.<sup>S4</sup> Data collection and structure refinement details can be found in the CIF files.

## 2. $^1\text{H}$ - $^1\text{H}$ COSY of M1

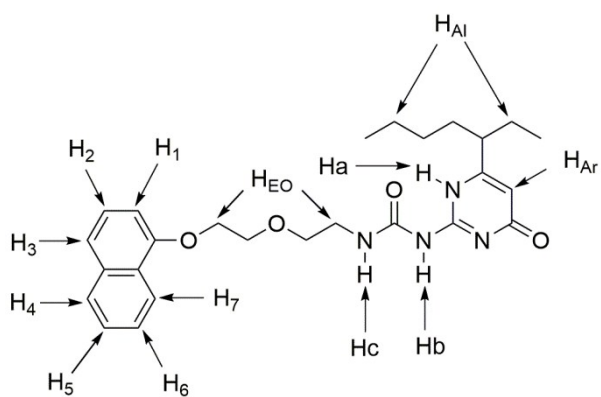

**Scheme S1** Structure of **M1**

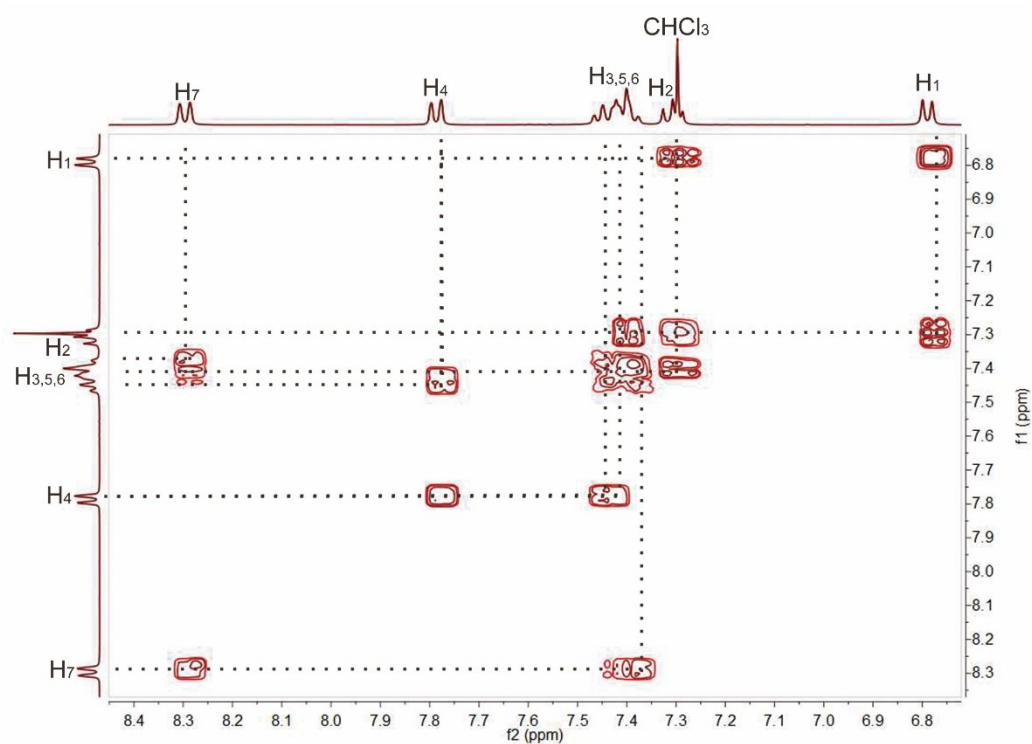

**Figure. S1**  $^1\text{H}$ - $^1\text{H}$  COSY (300 MHz, CDCl<sub>3</sub>, 298 K, 128 mM) of **M1**. Dashed line serves to guide the eye.

### 3. NOESY of M1

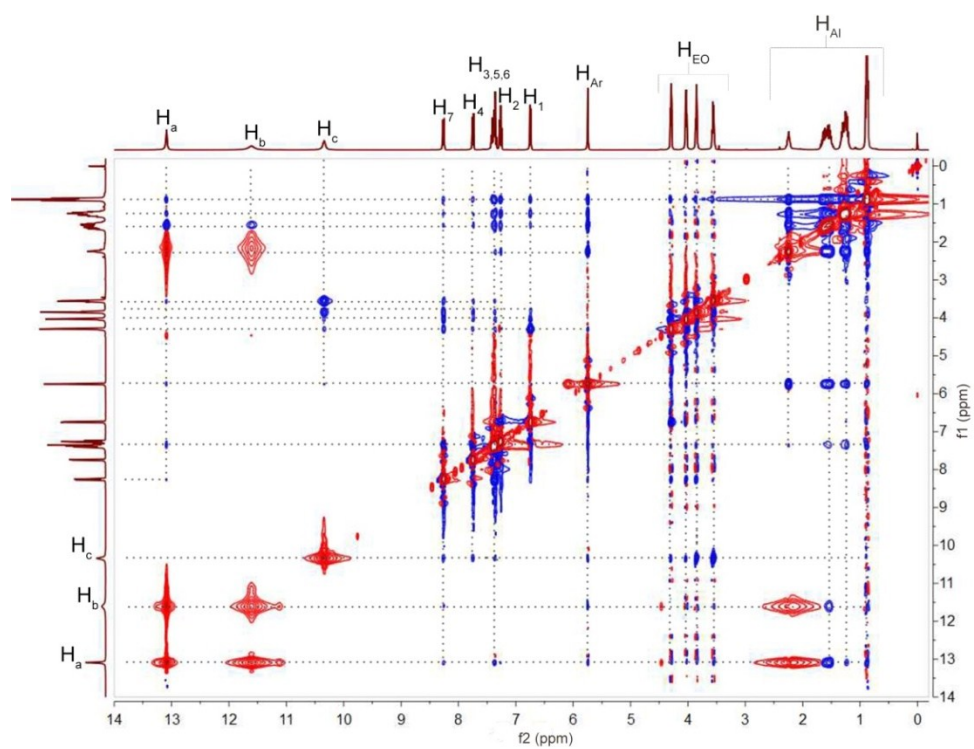

**Figure. S2** NOESY NMR spectrum (400 MHz, CDCl<sub>3</sub>, 298 K, 128 mM) of **M1**. Dashed line serves to guide the eye.

#### 4. DOSY of M1

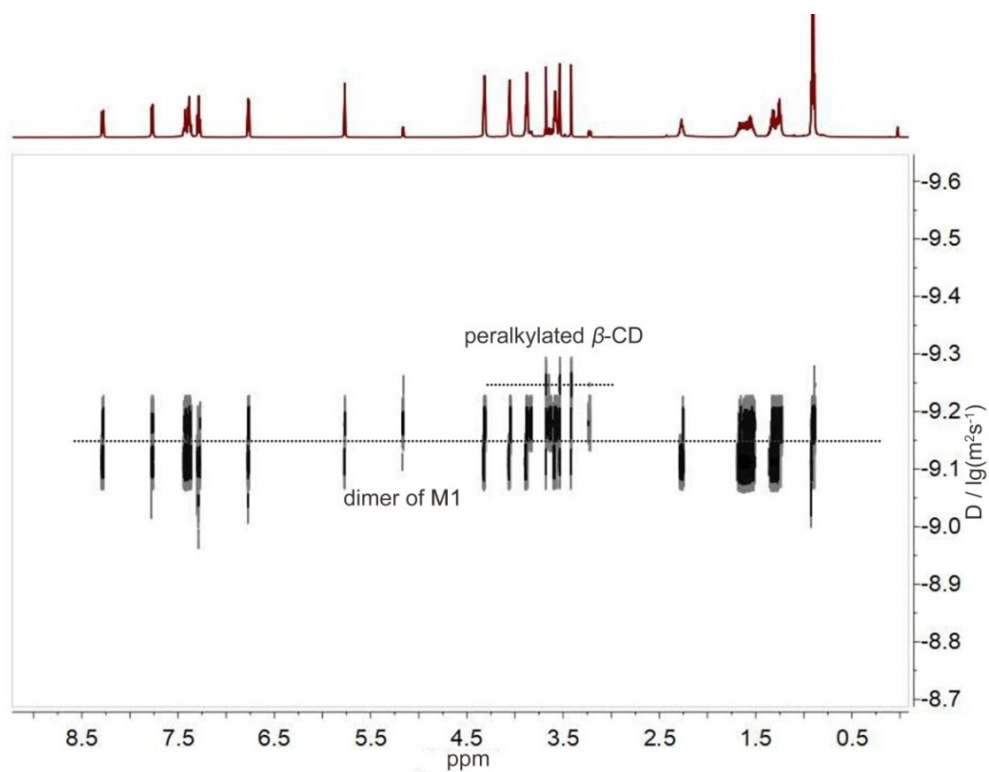

**Figure. S3** DOSY spectra (600 MHz,  $\text{CDCl}_3$ , 298 K) of **M1** in 128 mM with the addition of peralkylated  $\beta$ -CD as internal standard.

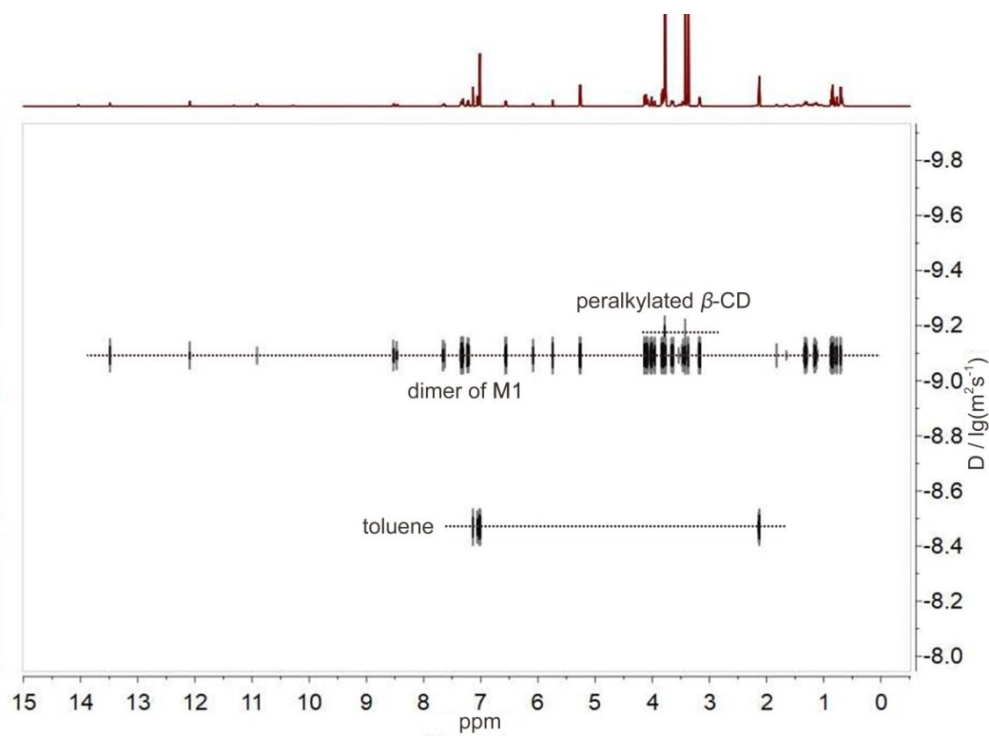

**Figure. S4** DOSY spectra (600 MHz,  $\text{toluene-}d_8$ , 298 K) of **M1** in 16 mM with the addition of peralkylated  $\beta$ -CD as internal standard.

## 5. Concentration-dependent $^1\text{H}$ NMR spectra of M1

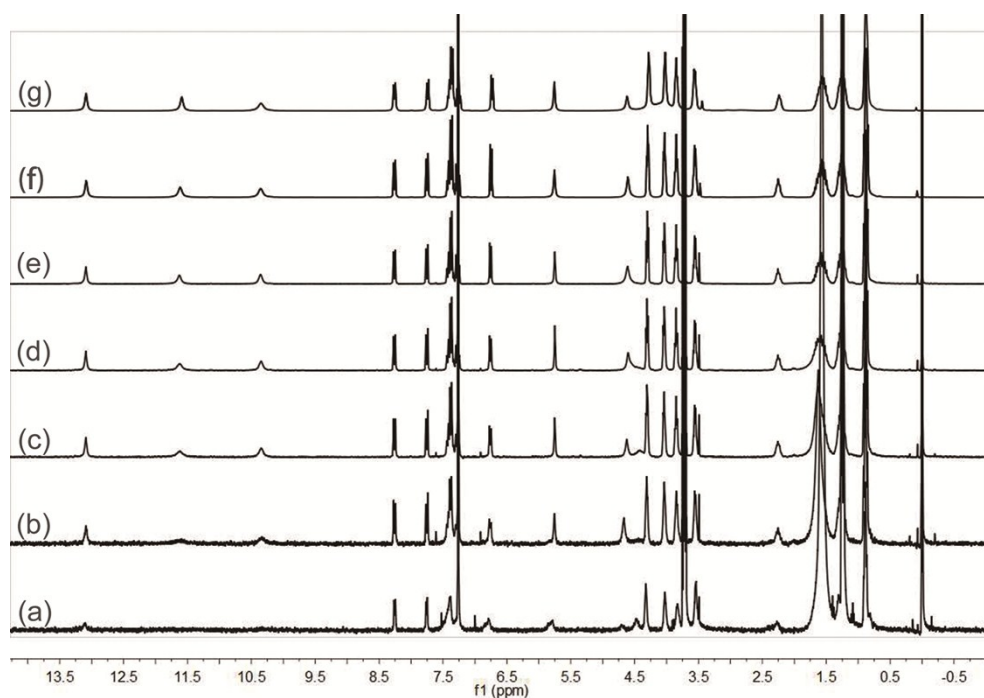

**Figure. S5**  $^1\text{H}$  NMR spectra (300 MHz,  $\text{CDCl}_3$ , 298 K) of **M1** at different monomer concentration: (a) 2, (b) 4, (c) 8, (d) 16, (e) 32, (f) 128, and (g) 500 mM.

## 6. Crystallographic Data for M2

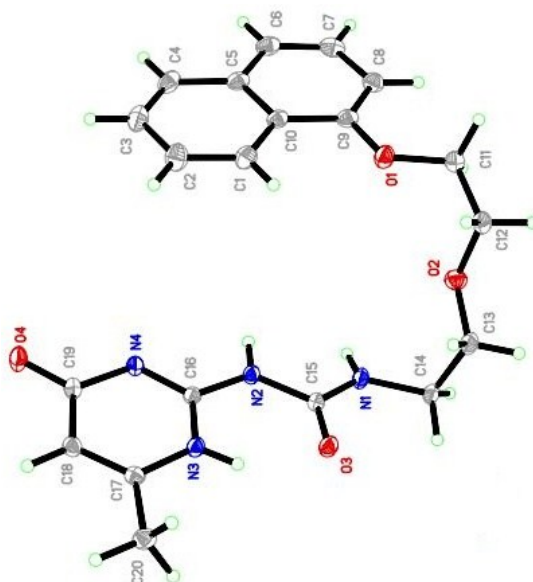

**Figure. S6** ORTEP drawing of **M2**

**Table S1** Crystal data and structure refinement parameter for **M2**

|                                                     |                                                                 |
|-----------------------------------------------------|-----------------------------------------------------------------|
| CCDC number                                         | 1847847                                                         |
| Empirical formula                                   | C <sub>20</sub> H <sub>22</sub> N <sub>4</sub> O <sub>4</sub>   |
| Formula weight                                      | 382.42                                                          |
| Temperature                                         | 153(2)                                                          |
| Wavelength                                          | 1.5406 Å                                                        |
| Crystal system                                      | Triclinic                                                       |
| Space group                                         | $P\bar{1}$                                                      |
| <i>a</i>                                            | 7.3086(4) Å                                                     |
| <i>b</i>                                            | 11.3812(8) Å                                                    |
| <i>c</i>                                            | 14.9481(9) Å                                                    |
| $\alpha$                                            | 68.663(2) Å                                                     |
| $\beta$                                             | 88.391(2) Å                                                     |
| $\gamma$                                            | 88.415(13) Å                                                    |
| Volume                                              | 1157.51(13) Å <sup>3</sup>                                      |
| <i>Z</i>                                            | 2                                                               |
| Density (calculated)                                | 1.4396                                                          |
| Absorption coefficient                              | 0.432                                                           |
| <i>F</i> (000)                                      | 520                                                             |
| Crystal size                                        | 0.26 × 0.22 × 0.19 mm <sup>3</sup>                              |
| Theta range for data collection                     | 2.79 to 27.59°                                                  |
| Index ranges                                        | -8 ≤ <i>h</i> ≤ 7, -12 ≤ <i>k</i> ≤ 13, -17 ≤ <i>l</i> ≤ 17     |
| Reflections collected                               | 4009                                                            |
| Independent reflections                             | 8141 [R(int) = 0.0211]                                          |
| Completeness to theta = 25.010°                     | 100.0 %                                                         |
| Absorption correction                               | multi-scan                                                      |
| Refinement method                                   | Full-matrix least-squares on <i>F</i> <sup>2</sup>              |
| Goodness-of-fit on <i>F</i> <sup>2</sup>            | 1.028                                                           |
| Final <i>R</i> indices [ <i>I</i> > 2σ( <i>I</i> )] | <i>R</i> <sub>1</sub> = 0.0510, <i>wR</i> <sub>2</sub> = 0.1237 |
| <i>R</i> indices (all data)                         | <i>R</i> <sub>1</sub> = 0.0571, <i>wR</i> <sub>2</sub> = 0.1293 |
| Largest diff. peak and hole                         | 0.710 and -0.670 e·Å <sup>-3</sup>                              |

## 7. Synthetic procedures and characterization of M1 and M2

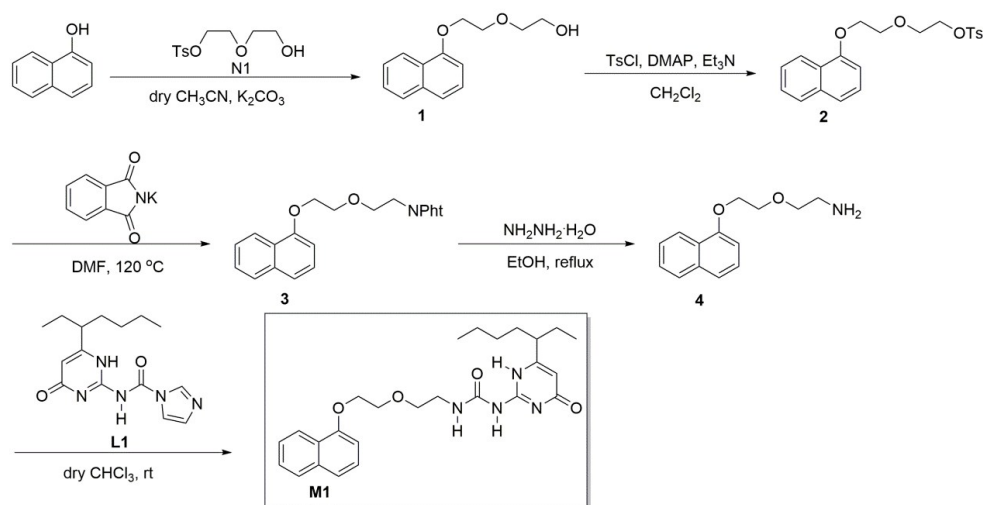

Scheme S2 Synthesis of the M1

### 7.1 Synthesis of compound 1:

1-naphthalenol (1.20 g, 7.5 mmol) was added to a degassed mixture of **N1** (2.34 g, 9.0 mmol), K<sub>2</sub>CO<sub>3</sub> (4.14 g, 30.0 mmol), and a catalytic amount of LiBr in dry MeCN (70 mL). The reaction mixture was heated under reflux for 24 h and filtered after cooling. The residue was dissolved in water (200 mL) and extracted with ethyl acetate (100 mL × 2). The organic layer was combined with the previously obtained filtrate, which was washed carefully with H<sub>2</sub>O (100 mL × 4) and brine (100 mL × 3) and dried over MgSO<sub>4</sub>. After the solvent was removed, the crude product was purified by silica-gel column chromatography (eluent: hexane/ethyl acetate = 10:1, v/v) to afford the target compound **1** as a light brown oil (1.37 g, 79%). <sup>1</sup>H NMR (CDCl<sub>3</sub>, 300 MHz) δ (ppm): 8.34-8.22 (m, 1H, naphthalene-*H*), 7.84-7.75 (m, 1H, naphthalene-*H*), 7.52-7.42 (m, 3H, naphthalene-*H*), 7.40-7.32 (m, 1H, naphthalene-*H*), 6.83 (d, *J* = 7.5 Hz, 1H, naphthalene-*H*), 4.35-4.30 (m, 2H, CH<sub>2</sub>O), 4.04-3.99 (m, 2H, CH<sub>2</sub>O), 3.81-3.73 (m, 4H, CH<sub>2</sub>O). <sup>13</sup>C NMR (CDCl<sub>3</sub>, 75 MHz) δ (ppm): 154.5, 134.5, 127.5, 126.5, 125.8, 125.7, 125.3, 122.0, 120.6, 105.0, 72.6, 69.8, 67.9, 61.9. ESI-MS: *m/z* calcd for [M + Na + CH<sub>3</sub>CN]<sup>+</sup> = 296.11, found = 296.00; HR-ESI-MS (C<sub>14</sub>H<sub>16</sub>O<sub>3</sub>): *m/z* calcd for [M + H]<sup>+</sup> = 233.1172, found = 233.1171 (100.0%).



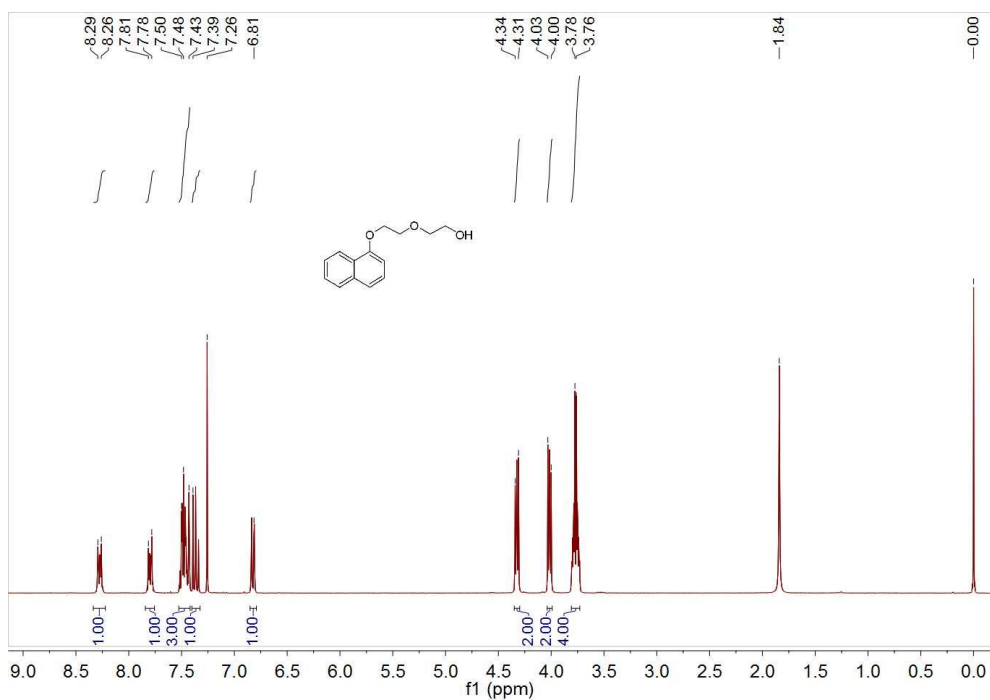

**Figure. S7** <sup>1</sup>H NMR (CDCl<sub>3</sub>, 300 MHz) spectrum of **1**

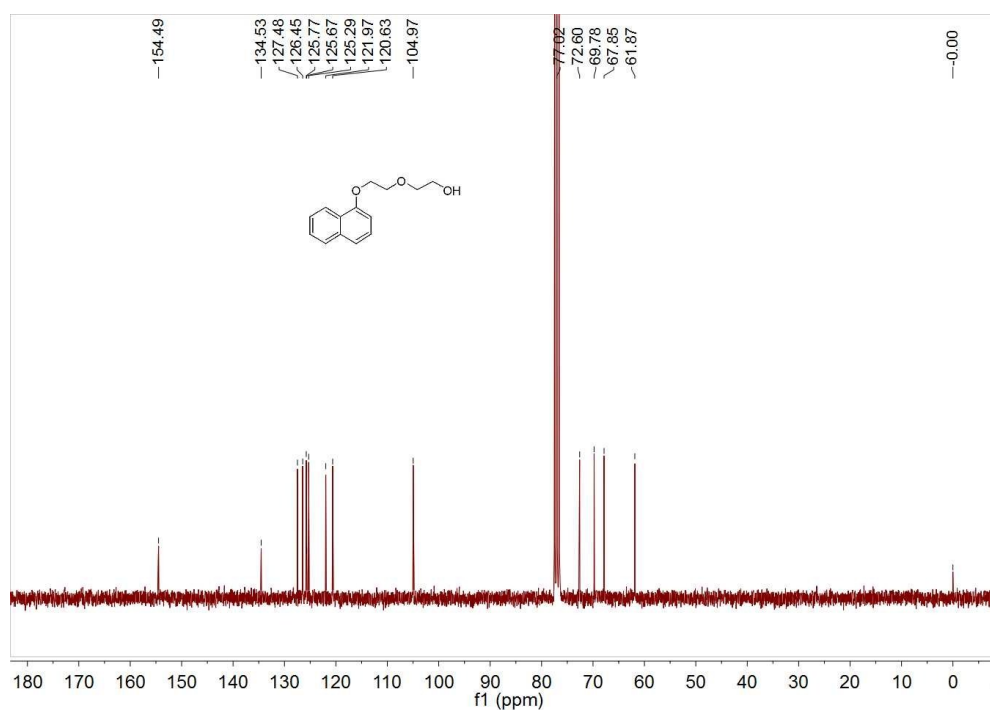

**Figure. S8** <sup>13</sup>C NMR (CDCl<sub>3</sub>, 75 MHz) spectrum of **1**

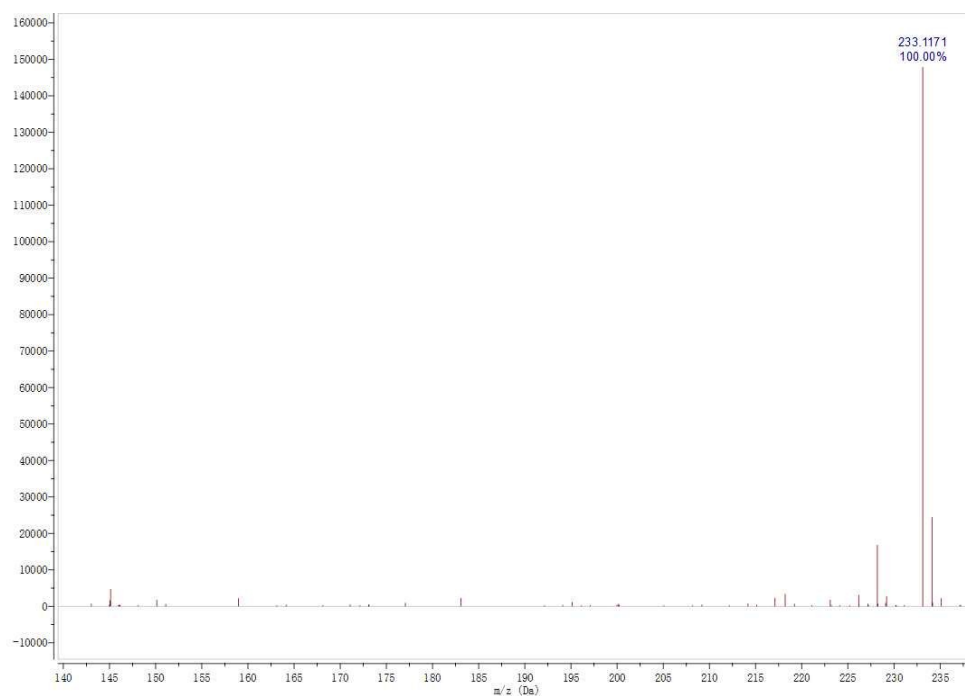

**Figure. S9** HR-ESI-MS of **1**

## 7.2 Synthesis of compound **2**:

Tosyl chloride (1.24 g, 6.5 mmol), Et<sub>3</sub>N (0.90 g, 8.9 mmol) and a catalytic amount of dimethylaminopyridine (72 mg, 0.6 mmol) were added to a solution of **1** (1.37 g, 5.9 mmol) in CH<sub>2</sub>Cl<sub>2</sub> (60 mL) at 0 °C. The mixture was slowly raised to room temperature. After stirring for 10 hours, the reaction solution was washed with 1 M HCl (150 mL × 2), saturated Na<sub>2</sub>CO<sub>3</sub> (200 mL × 3), brine (200 mL × 3), and dried over MgSO<sub>4</sub>. After the solvent was removed with an evaporator under reduced pressure, the resulting residue was subjected to silica-gel column chromatography (eluent: hexane/ethyl acetate = 10:1, v/v) to afford the target compound **2** as a yellowish oil (1.59 g, 69%). <sup>1</sup>H NMR (CDCl<sub>3</sub>, 300 MHz) δ (ppm): 8.27-8.17 (m, 1H, naphthalene-*H*), 7.84-7.73 (m, 3H, naphthalene-*H* and Ts-*H*), 7.52-7.41 (m, 3H, naphthalene-*H* and Ts-*H*), 7.40-7.32 (m, 1H, naphthalene-*H*), 7.24 (m, 2H, Ts-*H*), 6.78 (d, *J* = 7.5 Hz, 1H, naphthalene-*H*), 4.25-4.19 (m, 4H, OCH<sub>2</sub>), 3.95-3.90 (m, 2H, OCH<sub>2</sub>), 3.86-3.81 (m, 2H, OCH<sub>2</sub>), 2.35 (s, 3H, CH<sub>3</sub>). <sup>13</sup>C NMR (CDCl<sub>3</sub>, 75 MHz) δ (ppm): 154.4, 144.8, 134.5, 133.0, 129.8, 128.0, 127.4, 126.4, 125.8, 125.6, 125.3, 122.0, 120.6, 104.9, 70.0, 69.3, 69.0, 67.8, 21.6. ESI-MS: *m/z* calcd for [M + Na + CH<sub>3</sub>CN]<sup>+</sup> =

450.12, found = 450.00; HR-ESI-MS (C<sub>21</sub>H<sub>22</sub>O<sub>5</sub>S):  $m/z$  calcd for [M + NH<sub>4</sub>]<sup>+</sup> = 404.1526, found = 404.1527 (100.0%).

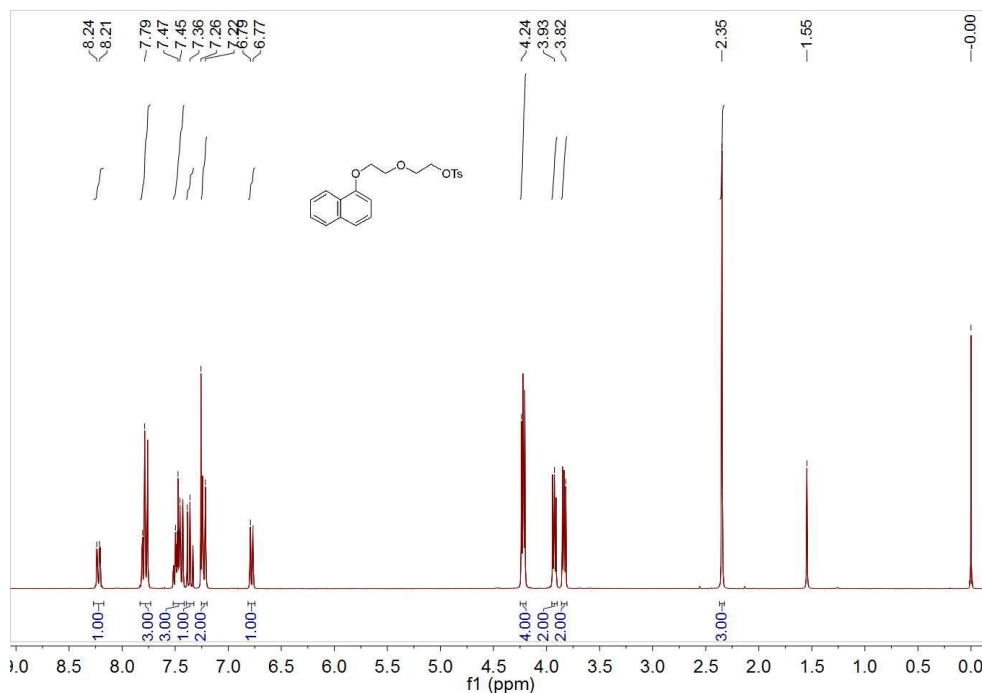

**Figure. S10** <sup>1</sup>H NMR (CDCl<sub>3</sub>, 300 MHz) spectrum of **2**

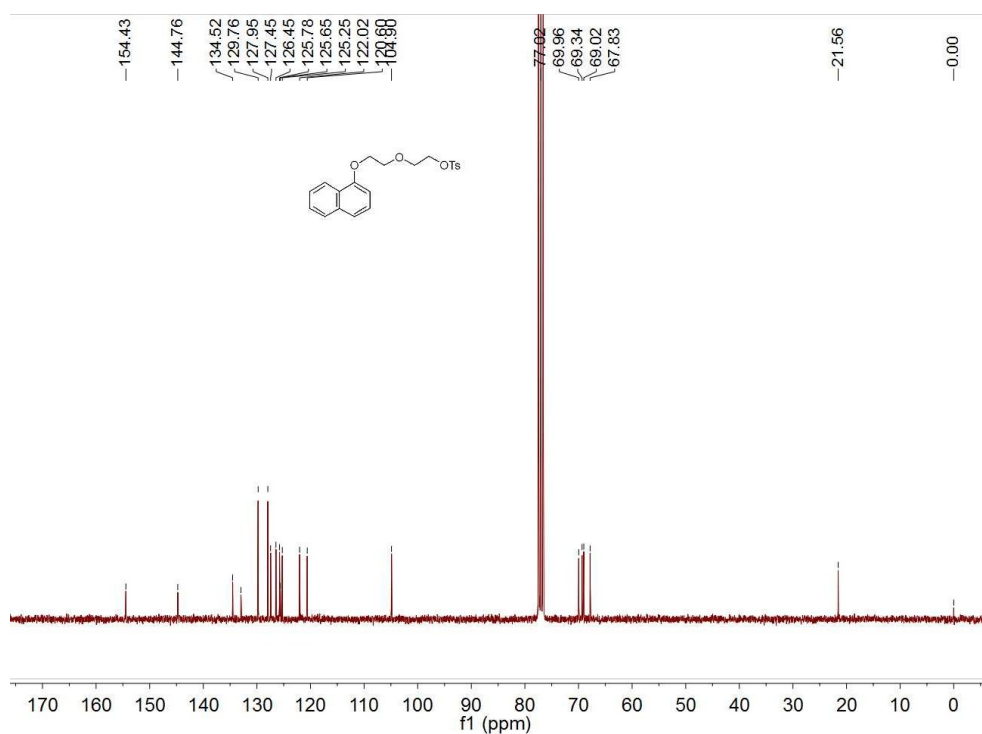

**Figure. S11** <sup>13</sup>C NMR (CDCl<sub>3</sub>, 75 MHz) spectrum of **2**

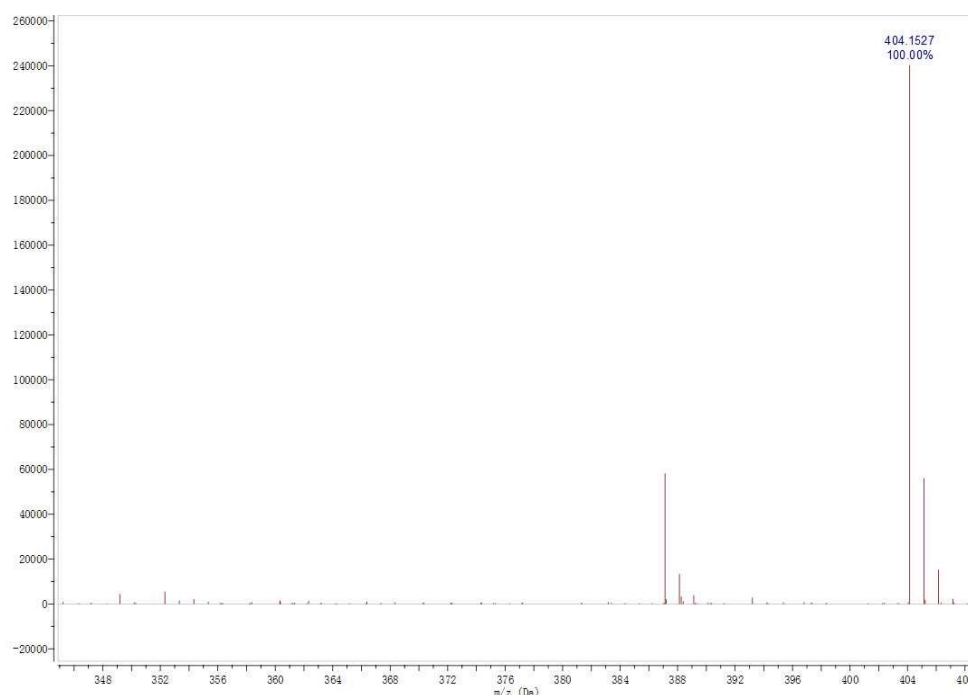

**Figure. S12** HR-ESI-MS of **2**

### 7.3 Synthesis of compound **3**:

To a solution of compound **2** (1.58 g, 4.1 mmol) in DMF (30 mL) was added potassium phthalimide (1.15 g, 6.2 mmol) at room temperature under N<sub>2</sub> atmosphere. The reaction mixture was heated at 120 °C for 12 h and then poured into water (50 mL). The resulting mixture was extracted with CH<sub>2</sub>Cl<sub>2</sub> (150 mL × 3) and the combined extracts were washed with brine (50 mL × 3), and dried over anhydrous MgSO<sub>4</sub> and concentrated under reduced pressure. The resulting residue was chromatographed over silica gel (eluent: hexane/ethyl acetate = 10:1, v/v) to afford compound **3** as a white solid (1.12 g, 76%). <sup>1</sup>H NMR (CDCl<sub>3</sub>, 300 MHz) δ (ppm): 8.23-8.13 (m, 1H, naphthalene-*H*), 7.79-7.71 (m, 3H, naphthalene-*H* and phthlimide-*H*), 7.65-7.59 (m, 2H, phthlimide-*H*), 7.48-7.36 (m, 3H, naphthalene-*H*), 7.33-7.27 (m, 1H, naphthalene-*H*), 6.75 (d, *J* = 6.6 Hz, 1H, naphthalene-*H*), 4.27-4.22 (m, 2H, OCH<sub>2</sub>), 3.01-3.88 (m, 6H, OCH<sub>2</sub>). <sup>13</sup>C NMR (CDCl<sub>3</sub>, 75 MHz) δ (ppm): 168.3, 154.5, 134.4, 133.8, 132.0, 127.3, 126.3, 125.7, 125.6, 125.1, 123.2, 122.1, 120.4, 104.8, 69.3, 68.2, 67.8, 37.4. ESI-MS: *m/z* calcd for [M + Na + CH<sub>3</sub>CN]<sup>+</sup> = 425.13, found = 425.00; HR-ESI-MS (C<sub>22</sub>H<sub>19</sub>NO<sub>4</sub>): *m/z* calcd for [M + H]<sup>+</sup> = 362.1387, found = 362.1389 (100.0%). m.p.: 110-112 °C.

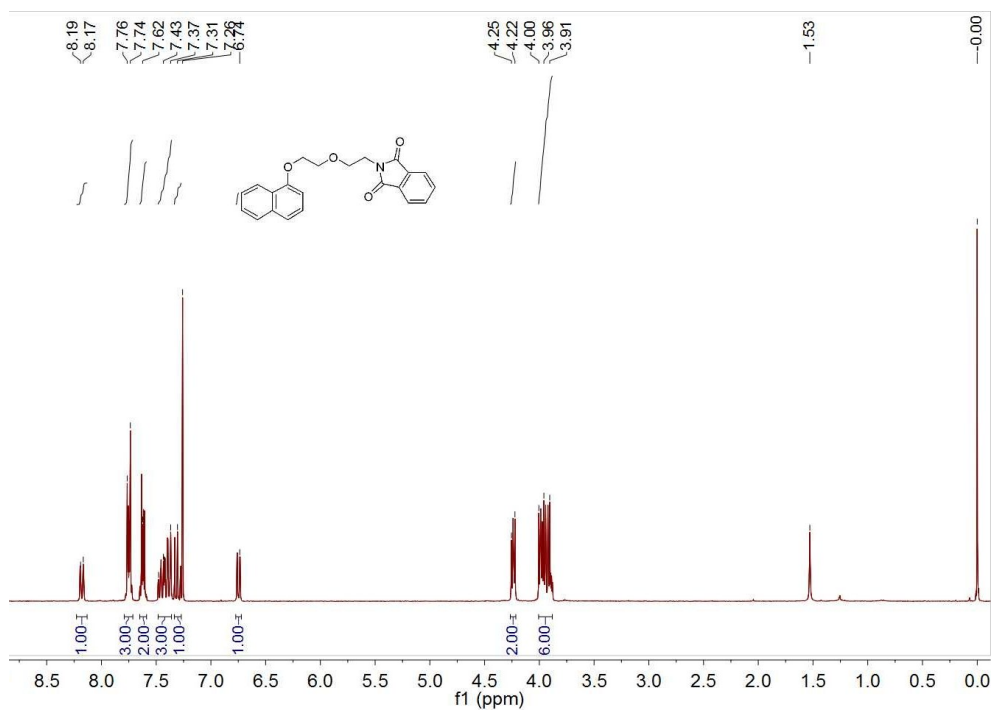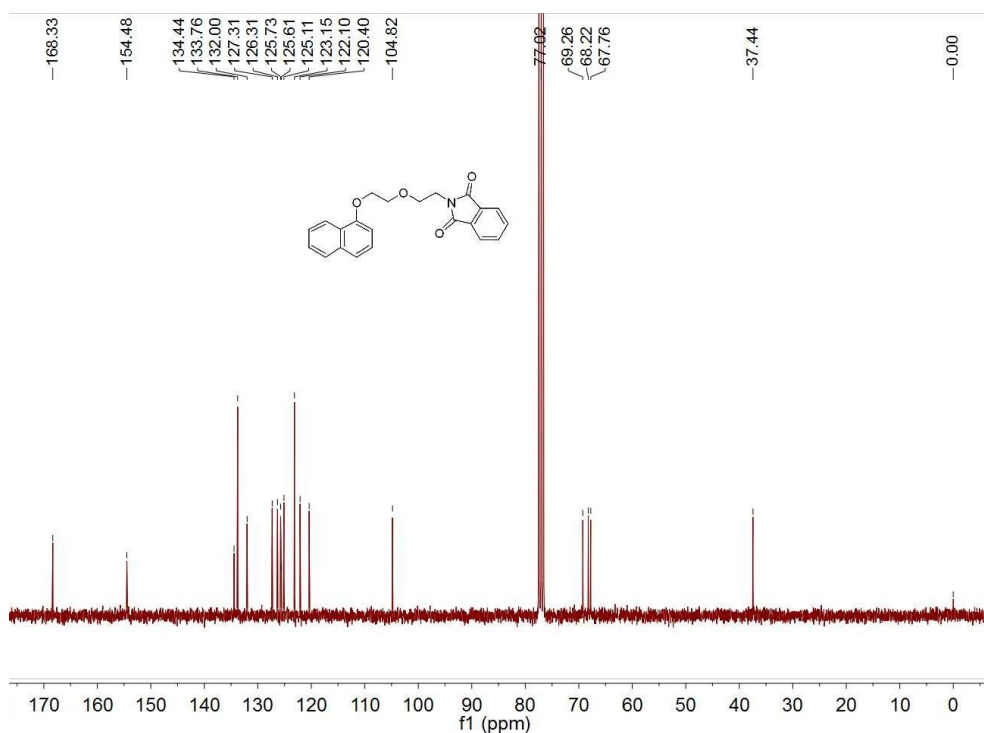

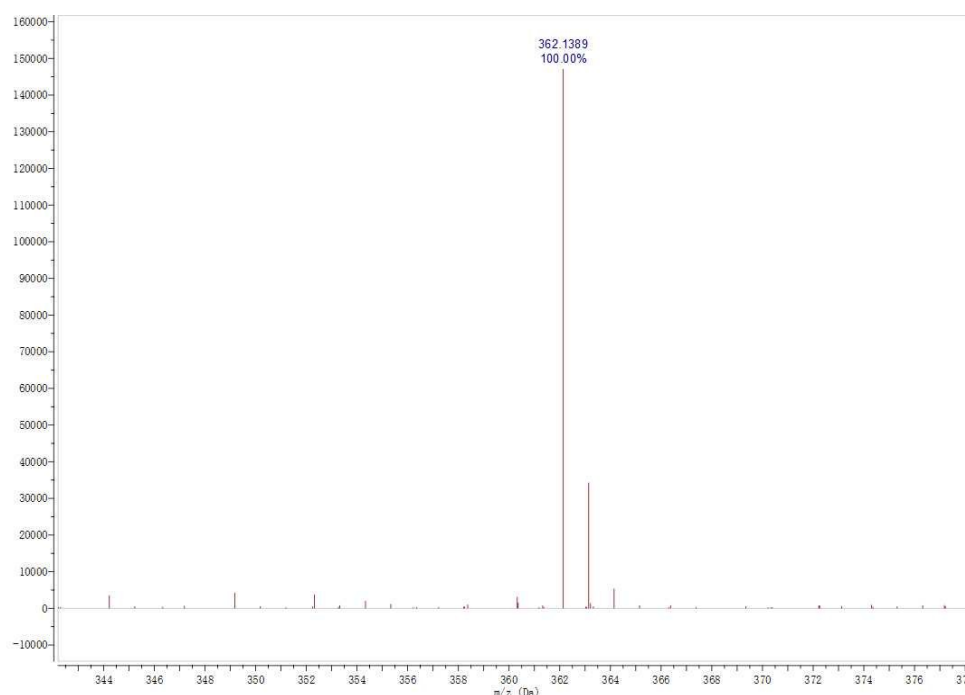

**Figure. S15 HR-ESI-MS of **3****

#### 7.4 Synthesis of compound **4**:

To a solution of **3** (0.92 g, 2.6 mmol) in EtOH (30 mL) was added dropwise hydrazine monohydrate (0.52 g, 10.3 mmol) and the mixture was then refluxed for 24 hours under N<sub>2</sub> atmosphere. The solvent was removed under vacuum. The residue was dissolved in CH<sub>2</sub>Cl<sub>2</sub> (300 mL) and washed with H<sub>2</sub>O (150 mL × 3), brine (150 mL × 3), and dried over anhydrous MgSO<sub>4</sub>. After the solvent was removed with an evaporator under reduced pressure, the resulting residue was subjected to column chromatography over alumina (eluent: 1% MeOH in CH<sub>2</sub>Cl<sub>2</sub> → 5% MeOH in CH<sub>2</sub>Cl<sub>2</sub>) to give the desired compound **4** as a yellow oil (0.51 g, 86%). <sup>1</sup>H NMR (CDCl<sub>3</sub>, 400 MHz) δ (ppm): 8.46-8.06 (m, 1H, naphthalene-*H*), 7.85-7.71 (m, 1H naphthalene-*H*), 7.53-7.40 (m, 3H, naphthalene-*H*), 7.39-7.29 (m, 1H, naphthalene-*H*), 6.82 (d, *J* = 7.5 Hz, 1H, naphthalene-*H*), 4.34-4.27 (m, 2H, OCH<sub>2</sub>), 4.00-3.94 (m, 2H, OCH<sub>2</sub>), 3.66 (t, *J* = 5.1 Hz, 2H, OCH<sub>2</sub>), 2.93 (s, 2H, OCH<sub>2</sub>). <sup>13</sup>C NMR (CDCl<sub>3</sub>, 75 MHz) δ (ppm): 154.5, 134.5, 127.4, 126.4, 125.8, 125.7, 125.2, 122.0, 120.5, 104.9, 73.10, 69.59, 67.86, 41.69. ESI-MS: *m/z* calcd for [M + H]<sup>+</sup> = 232.13, found = 232.05; HR-ESI-MS (C<sub>14</sub>H<sub>17</sub>NO<sub>2</sub>): *m/z* calcd for [M + H]<sup>+</sup> = 232.1332, found = 232.1329 (100.0%).

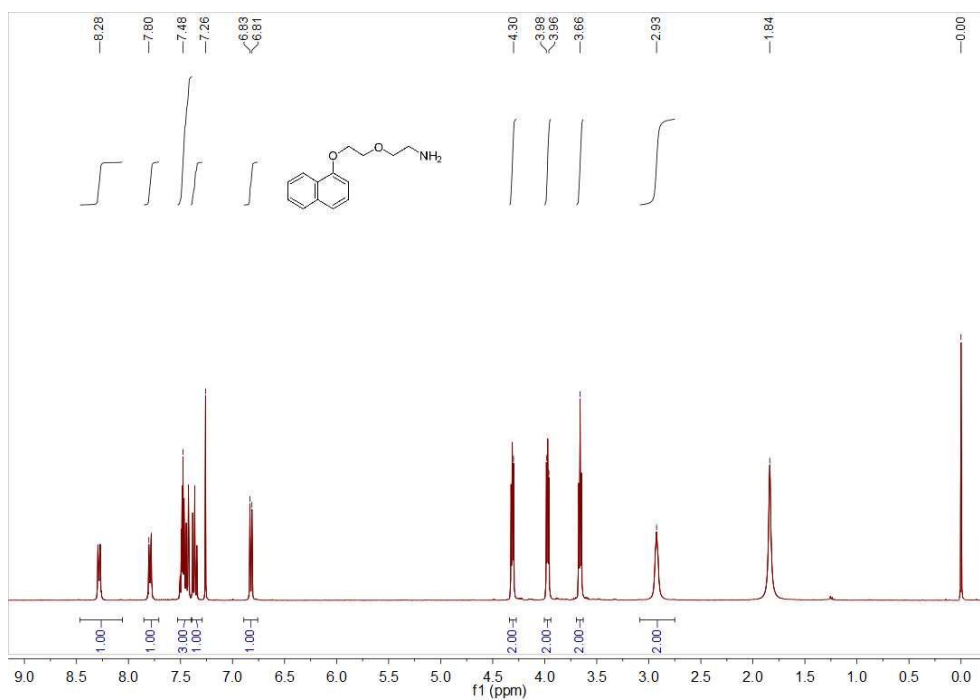

**Figure. S16** <sup>1</sup>H NMR (CDCl<sub>3</sub>, 400 MHz) spectrum of **4**

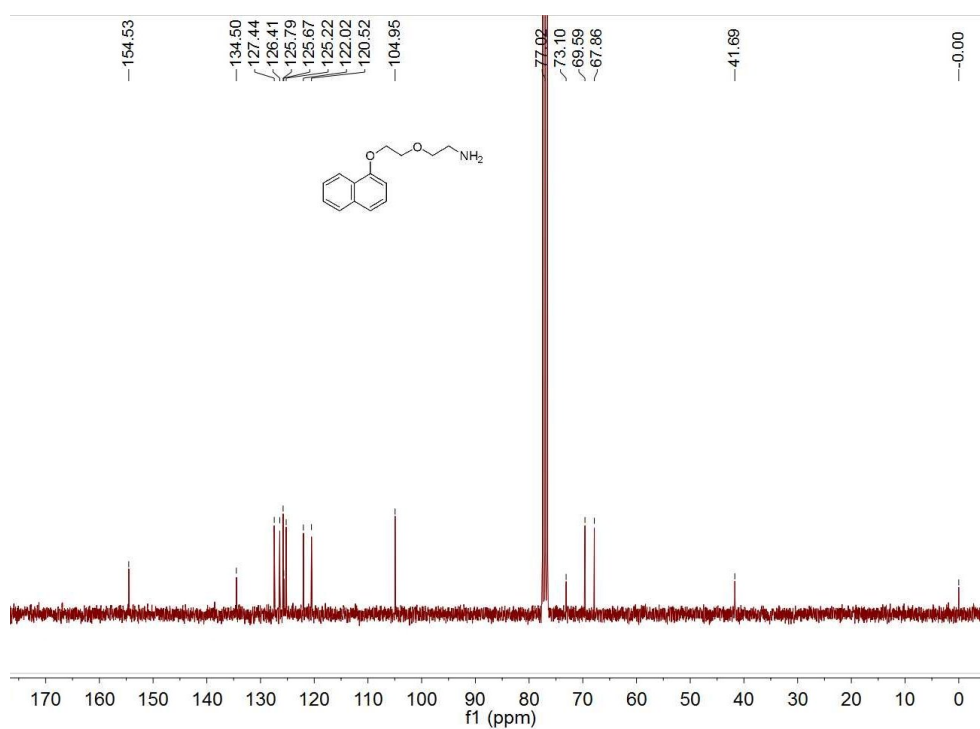

**Figure. S17** <sup>13</sup>C NMR (CDCl<sub>3</sub>, 75 MHz) spectrum of **4**

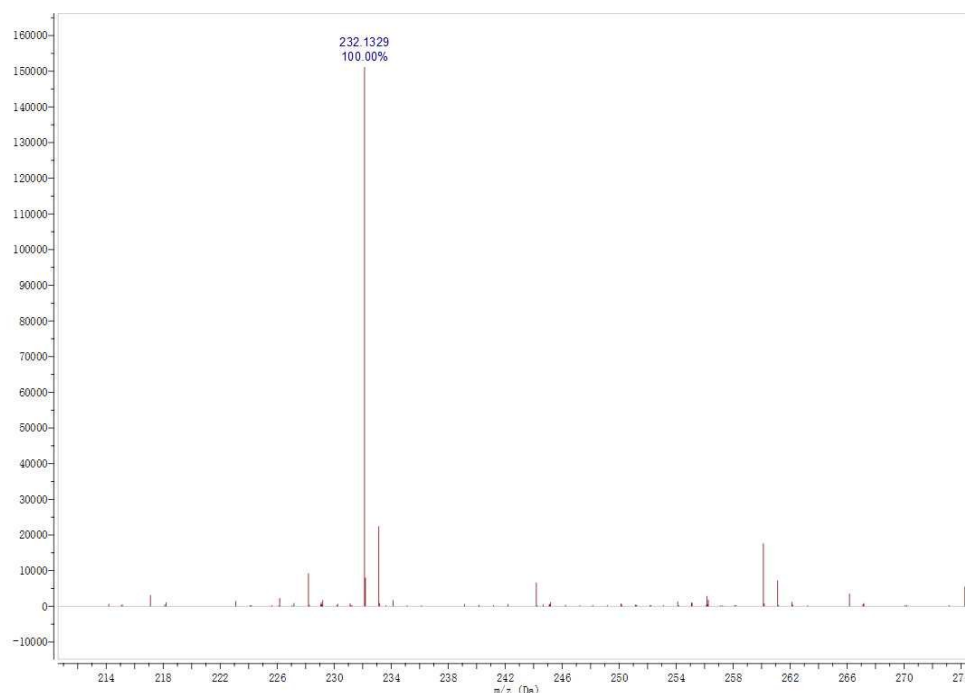

**Figure. S18** HR-ESI-MS of **4**

### 7.5 Synthesis of compound **M1**:

Imidazolidine **L1** (1.01 g, 3.7 mmol) and **4** (0.52 g, 2.2 mmol) were dissolved in 60 mL of dry  $\text{CHCl}_3$  and this solution was stirred for 12 h under nitrogen at room temperature. To the reaction mixture 30 mL of  $\text{CHCl}_3$  was added and the mixture was washed with 1 M HCl (50 mL  $\times$  2), saturated  $\text{NaHCO}_3$  (100 mL  $\times$  2), brine (100 mL  $\times$  2), and dried over anhydrous  $\text{MgSO}_4$ . After the solvent was removed, the resulting residue was subjected to column chromatography over silica gel (eluent:  $\text{CHCl}_3$ ) to afford compound **M1** as a light yellow oil (0.90 g, 45%).  $^1\text{H}$  NMR ( $\text{CDCl}_3$ , 400 MHz)  $\delta$  (ppm): 13.09 (s, 1H, NH), 11.64 (br s, 1H, NH), 10.35 (s, 1H, NH), 8.26 (d,  $J$  = 8.2 Hz, 1H, naphthalene-H), 7.75 (d,  $J$  = 7.8 Hz, 1H, naphthalene-H), 7.45-7.25 (m, 4H, naphthalene-H), 6.75 (d,  $J$  = 7.6 Hz, 1H, naphthalene-H), 5.74 (s, 1H, alkylidene-H), 4.33-4.26 (m, 2H,  $\text{OCH}_2$ ), 4.08-3.99 (m, 2H,  $\text{OCH}_2$ ), 3.90-3.79 (m, 2H,  $\text{OCH}_2$ ), 3.60-3.49 (m, 2H,  $\text{OCH}_2$ ), 2.31-2.20 (m, 1H,  $\text{CH}(\text{CH}_2)_2$ ), 1.68-1.48 (m, 4H,  $\text{CH}_2$ ), 1.34-1.18 (m, 4H,  $\text{CH}_2$ ), 0.93-0.82 (m, 6H,  $\text{CH}_3$ ).  $^{13}\text{C}$  NMR ( $\text{CDCl}_3$ , 100 MHz)  $\delta$  (ppm): 173.0, 157.0, 155.3, 154.7, 154.5, 134.5, 127.4, 126.3, 125.7, 125.0, 122.1, 120.3, 106.1, 104.6, 70.0, 69.5, 67.8, 65.0, 45.2, 39.8, 32.8, 29.3, 26.5, 22.5, 13.9, 11.6. ESI-MS:  $m/z$  calcd for  $[\text{M} + \text{CF}_3\text{COO}]^-$  = 579.26, found = 579.10; HR-ESI-MS ( $\text{C}_{26}\text{H}_{34}\text{N}_4\text{O}_4$ ):  $m/z$



calcd for  $[M + H]^+ = 467.2653$ , found = 467.2654 (45.47%);  $m/z$  calcd for  $[2M + H]^+ = 933.5233$ ,  
found = 933.5224 (100.0%).

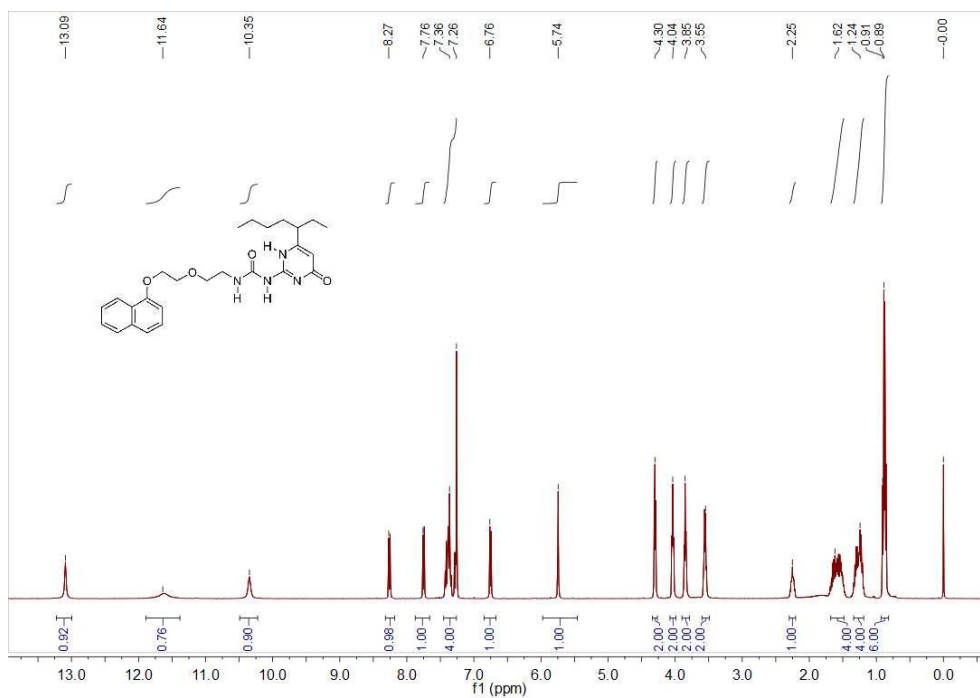

**Figure. S19** <sup>1</sup>H NMR (CDCl<sub>3</sub>, 400 MHz) spectrum of M1

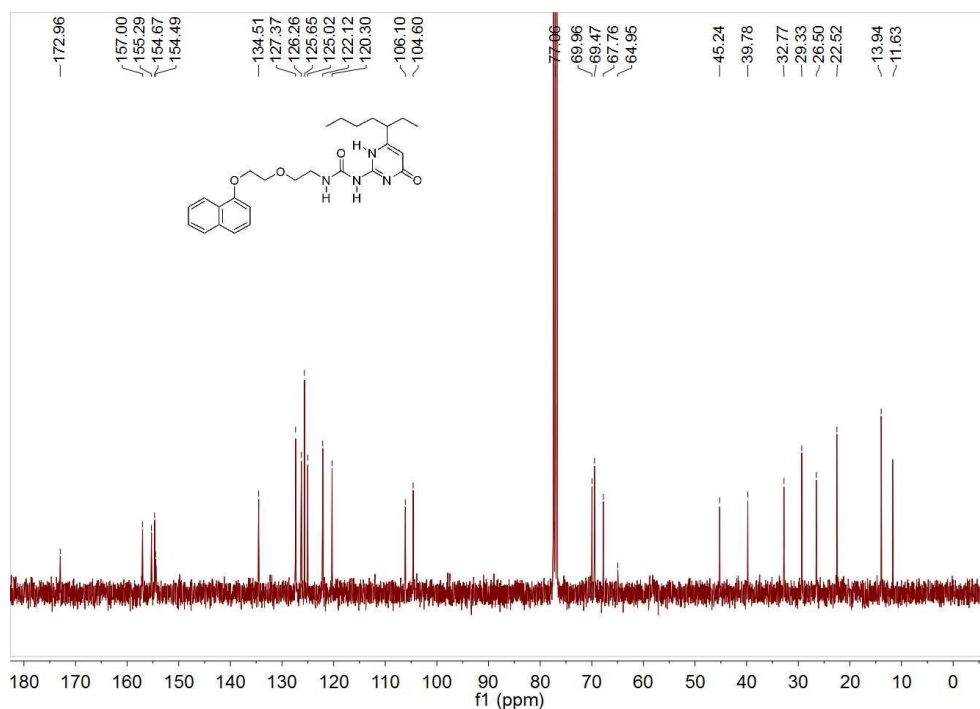

**Figure. S20** <sup>13</sup>C NMR (CDCl<sub>3</sub>, 100 MHz) spectrum of M1

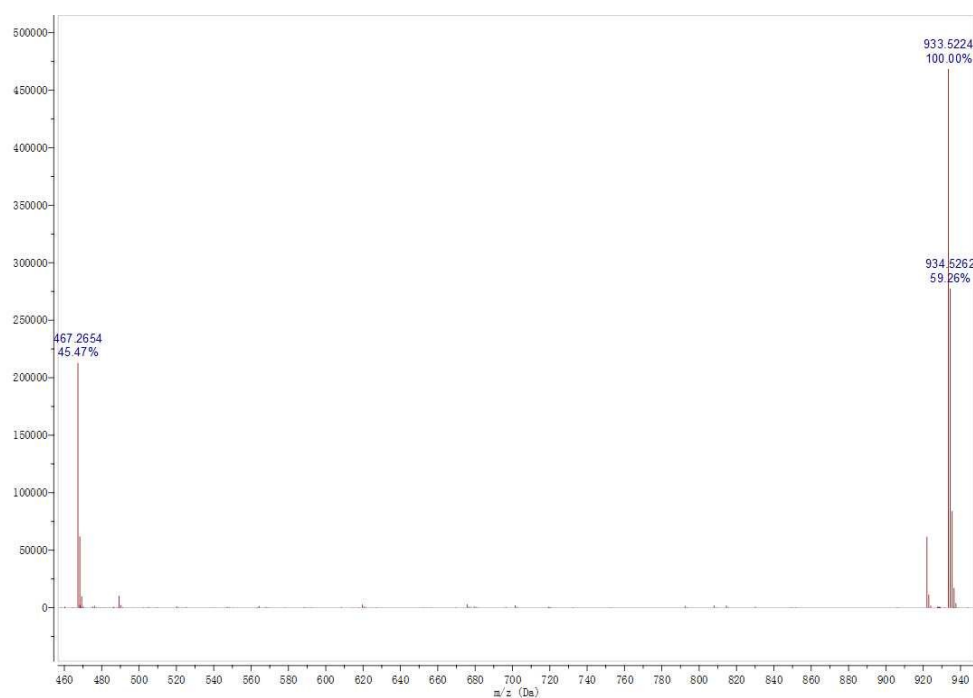

**Figure. S21** HR-ESI-MS of **M1**

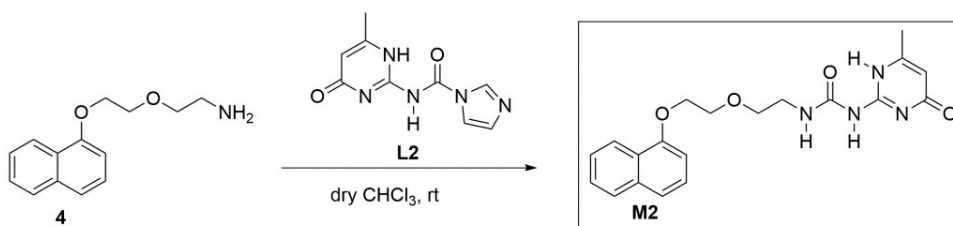

**Scheme S3** Synthesis of the **M2**

## 7.6 Synthesis of compound **M2**:

Imidazolidine **L2** (0.92 g, 4.2 mmol) and **4** (0.27 g, 1.2 mmol) were dissolved in 30 mL of dry  $\text{CHCl}_3$  and this solution was stirred for 12 h under nitrogen at room temperature. To the reaction mixture 20 mL of  $\text{CHCl}_3$  was added and the organic layer was washed with 1 M HCl (35 mL), saturated  $\text{NaHCO}_3$  (50 mL  $\times$  3), brine (20 mL  $\times$  3), and dried over anhydrous  $\text{MgSO}_4$ . After the solvent was removed, the resulting residue was subjected to column chromatography over silica gel (eluent:  $\text{CHCl}_3$ ) to afford compound **M2** as a white solid (0.20 g, 45%).  $^1\text{H}$  NMR ( $\text{CDCl}_3$ , 300 MHz)  $\delta$  (ppm): 12.86 (s, 1H, NH), 11.40 (s, 1H, NH), 10.30 (s, 1H, NH), 8.23 (d,  $J$  = 8.2 Hz, 1H, naphthalene-H), 7.72 (d,  $J$  = 7.7 Hz, 1H, naphthalene-H), 7.44-7.25 (m, 4H, naphthalene-H), 6.72 (d,  $J$  = 7.5 Hz, 1H, naphthalene-H), 5.66 (s, 1H, alkylidene-H), 4.31-4.25 (m, 2H,  $\text{OCH}_2$ ), 4.06-

4.01 (m, 2H, OCH<sub>2</sub>), 3.88-3.81 (m, 2H, OCH<sub>2</sub>), 3.59-3.50 (m, 2H, OCH<sub>2</sub>), 2.11 (s, 3H, CH<sub>3</sub>). <sup>1</sup>H NMR (CDCl<sub>3</sub>, 300 MHz) δ (ppm): 171.7, 155.7, 153.6, 153.0, 146.8, 133.4, 126.3, 125.2, 124.6, 124.5, 123.9, 121.0, 119.1, 105.4, 103.4, 68.9, 68.5, 66.6, 38.8, 17.8. ESI-MS: *m/z* calcd for [M + CF<sub>3</sub>COO]<sup>-</sup> = 495.16, found = 495.05; HR-ESI-MS (C<sub>20</sub>H<sub>22</sub>N<sub>4</sub>O<sub>4</sub>): *m/z* calcd for [M + H]<sup>+</sup> = 383.1714, found = 383.1716 (47.93%); *m/z* calcd for [2M + H]<sup>+</sup> = 765.3355, found = 765.3350 (100.0%). m.p.: 144-147 °C.

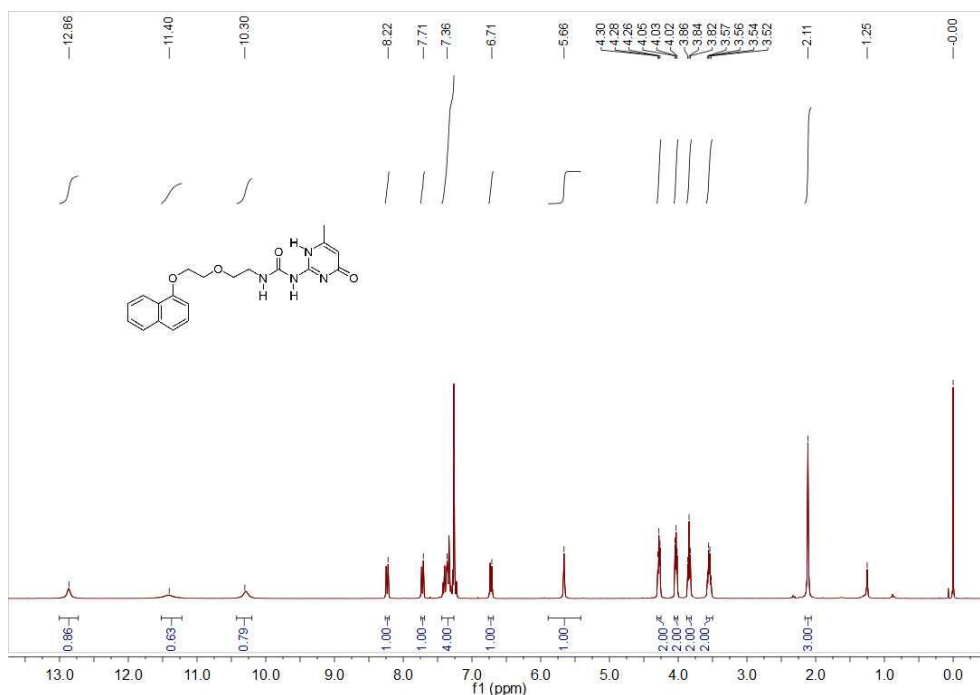

**Figure. S22** <sup>1</sup>H NMR (CDCl<sub>3</sub>, 300 MHz) spectrum of **M2**

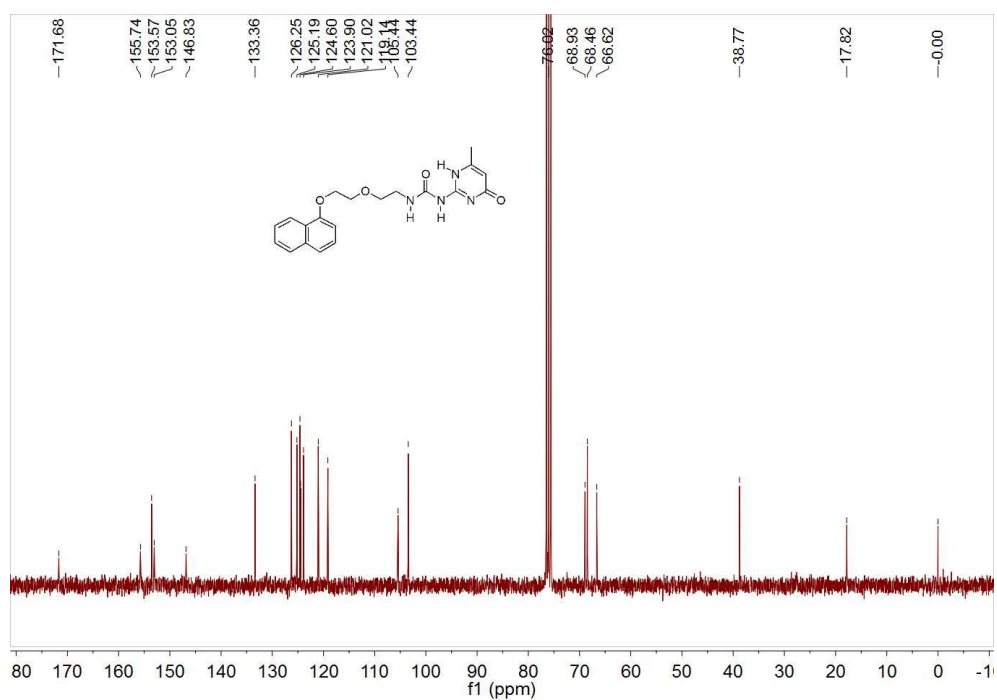

**Figure. S23**  $^{13}\text{C}$  NMR ( $\text{CDCl}_3$ , 75 MHz) spectrum of **M2**

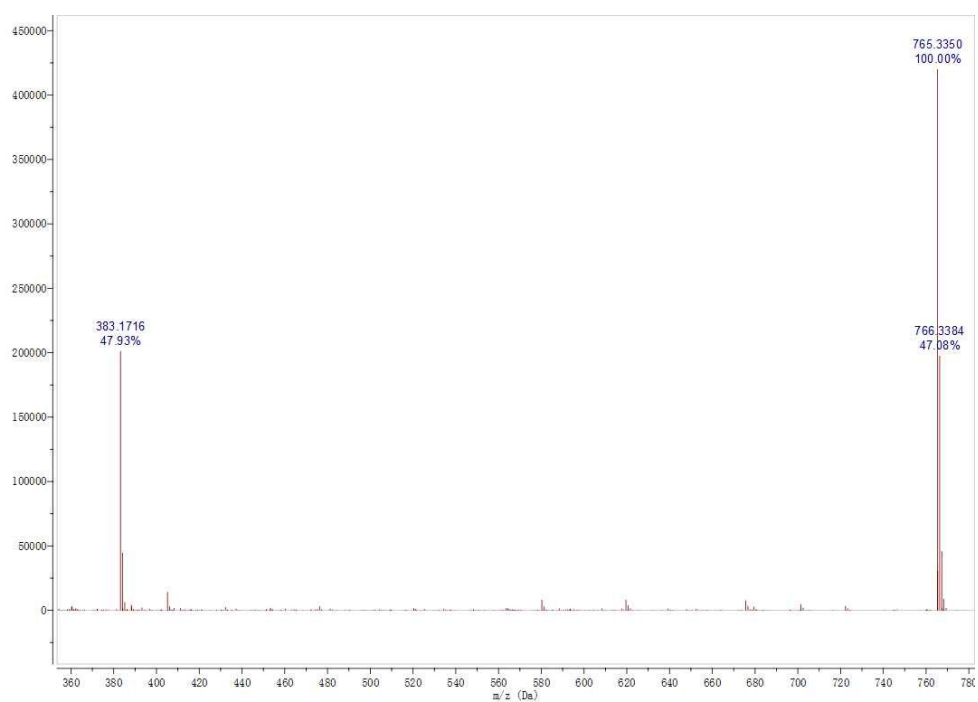

**Figure. S24** HR-ESI-MS of **M2**

## 8. Reference

- S1. Sato, R.; Kozuka, J.; Ueda, M.; Mishima, R.; Kumagai, Y.; Yoshimura, A.; Minoshima, M.; Mizukami, S.; Kikuchi, K., *J. Am. Chem. Soc.*, 2017, **139**, 17397-17404.
- S2. Ma, Y.-Z.; Xiao, H.; Yang, X.-F.; Niu, L.-Y.; Wu, L.-Z.; Tung, C.-H.; Chen, Y.-Z.; Yang, Q.-Z., *J. Phys. Chem. C*, 2016, **120**, 16507-16515.
- S3. Rodrigues, M. V. N.; Barbosa, A. F.; da Silva, J. F.; dos Santos, D. A.; Vanzolini, K. L.; de Moraes, M. C.; Corrêa, A. G.; Cass, Q. B., *Bioorg. Med. Chem.*, 2016, **24**, 226-231.
- S4. Sheldrick, G. M. *SHELXL-97*: Crystal Structure Refinement, University of Göttingen: Göttingen, Germany, 1997.
